# Supplementary material for: Renal Function and Body Mass Index Contribute to Serum Neurofilament Light Chain Levels in Elderly Patients With Atrial Fibrillation
Source: Frontiers journal article supplement (doi:10.3389/fnins.2022.819010), 2022-04-14
Supplement: Data_Sheet_1.pdf [file Data_Sheet_1.pdf]

## **Supplementary Material**

### **Renal function and body mass index contribute to serum neurofilament light chain levels in elderly patients with atrial fibrillation**

Polymeris et al.

**Supplementary Figure 1.** Study flowchart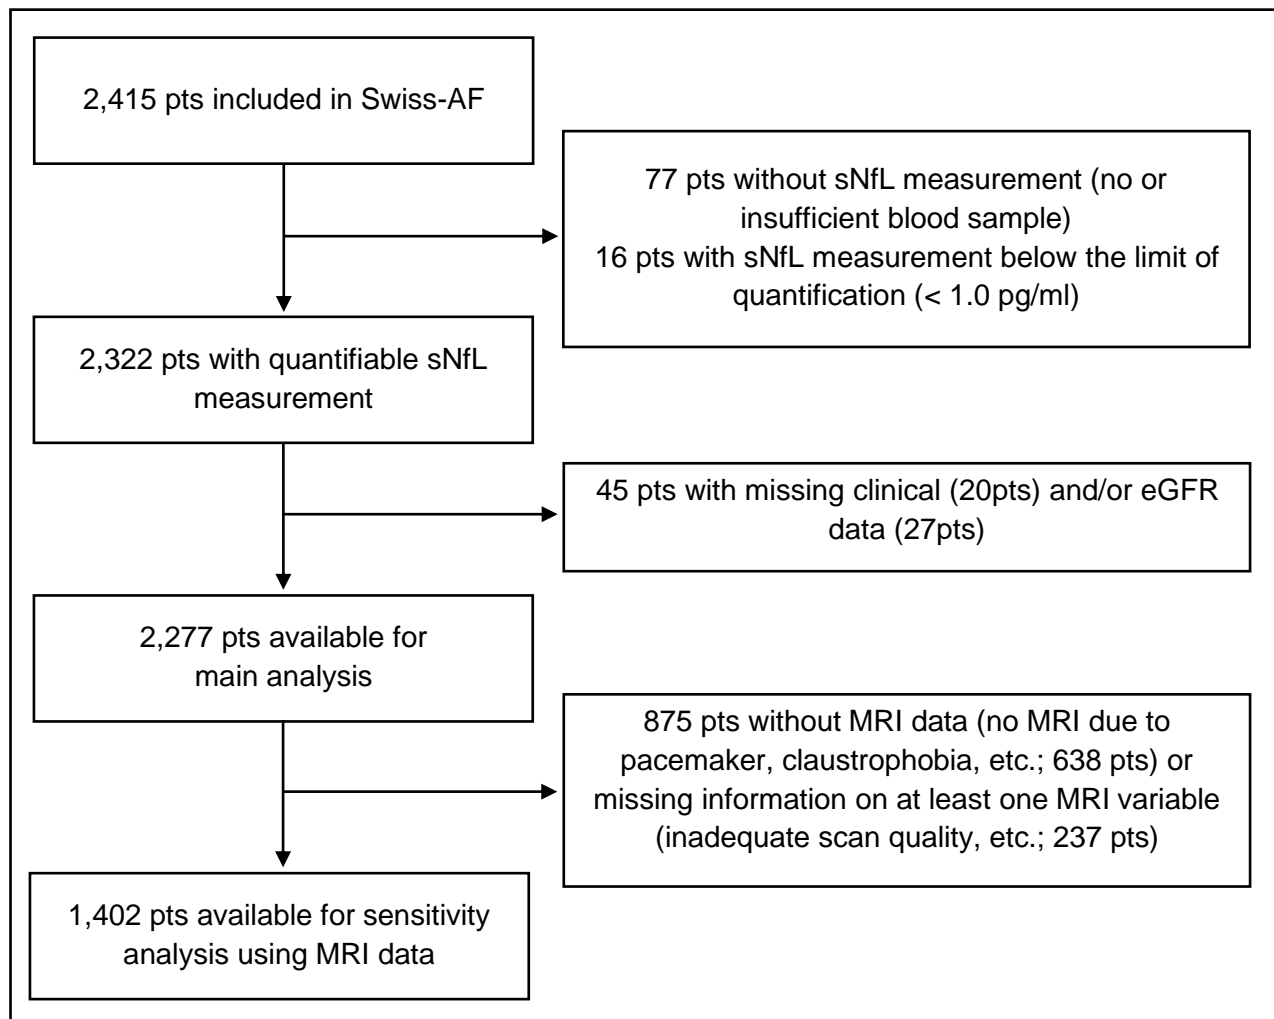

**Supplementary Table 1.** Linear, quadratic and cubic modelling of the association of eGFR and age with sNfL

| Model<br>(N= 2,277)          | Component | eGFR <sub>crea</sub><br>(centered; per10 ml/min/1.73m <sup>2</sup> ) |                |         |       | eGFR <sub>crea-cys</sub><br>(centered; per10 ml/min/1.73m <sup>2</sup> ) |                |         |       | Age<br>(centered; per decade) |                |         |       |
|------------------------------|-----------|----------------------------------------------------------------------|----------------|---------|-------|--------------------------------------------------------------------------|----------------|---------|-------|-------------------------------|----------------|---------|-------|
|                              |           | $\beta_{\text{mult}}$                                                | 95%-CI         | p-value | AIC   | $\beta_{\text{mult}}$                                                    | 95%-CI         | p-value | AIC   | $\beta_{\text{mult}}$         | 95%-CI         | p-value | AIC   |
| Linear                       | linear    | 0.810                                                                | [0.800, 0.820] | <0.001  | 3702  | 0.811                                                                    | [0.802, 0.819] | <0.001  | 3470  | 1.497                         | [1.456, 1.539] | <0.001  | 3930  |
| Quadratic                    | linear    | 0.812                                                                | [0.802, 0.822] | <0.001  | 3644  | 0.807                                                                    | [0.799, 0.816] | <0.001  | 3396  | 1.501                         | [1.457, 1.546] | <0.001  | 3932  |
|                              | quadratic | 1.020                                                                | [1.015, 1.025] | <0.001  |       | 1.018                                                                    | [1.014, 1.021] | <0.001  |       | 1.005                         | [0.984, 1.027] | 0.622   |       |
| Cubic                        | linear    | 0.842                                                                | [0.824, 0.860] | <0.001  | 3629* | 0.827                                                                    | [0.813, 0.842] | <0.001  | 3386* | 1.571                         | [1.504, 1.641] | <0.001  | 3927  |
|                              | quadratic | 1.019                                                                | [1.014, 1.024] | <0.001  |       | 1.020                                                                    | [1.016, 1.024] | <0.001  |       | 0.979                         | [0.952, 1.007] | 0.147   |       |
|                              | cubic     | 0.996                                                                | [0.994, 0.998] | <0.001  |       | 0.998                                                                    | [0.997, 0.999] | <0.001  |       | 0.978                         | [0.963, 0.994] | 0.006   |       |
| Cubic without quadratic term | linear    | 0.848                                                                | [0.830, 0.866] | <0.001  | 3678  | 0.816                                                                    | [0.802, 0.830] | <0.001  | 3471  | 1.555                         | [1.492, 1.621] | <0.001  | 3927* |
|                              | cubic     | 0.995                                                                | [0.993, 0.997] | <0.001  |       | 0.999                                                                    | [0.998, 1.001] | 0.333   |       | 0.986                         | [0.974, 0.997] | 0.016   |       |

eGFR, estimated glomerular filtration rate; AIC, Akaike's information criterion

\*best model, selected based on AIC values and degrees of freedom

**Supplementary Table 2.** Model-based estimates for the association of eGFR<sub>crea</sub> and BMI with sNfL in four age-quartile subgroups, describing the changes in curvature (eGFR<sub>crea</sub>) or slope (BMI) in each age subgroup

| Variable                                                                  | age 37.0 – 68.3 years<br>(N = 570) |                |         | age 68.3 – 73.6 years<br>(N = 569) |                |         | age 73.6 – 79.1 years<br>(N = 569) |                |         | age 79.1 – 95.2 years<br>(N = 569) |                |         |
|---------------------------------------------------------------------------|------------------------------------|----------------|---------|------------------------------------|----------------|---------|------------------------------------|----------------|---------|------------------------------------|----------------|---------|
|                                                                           | $\beta_{\text{mult}}$              | 95%-CI         | p-value | $\beta_{\text{mult}}$              | 95%-CI         | p-value | $\beta_{\text{mult}}$              | 95%-CI         | p-value | $\beta_{\text{mult}}$              | 95%-CI         | p-value |
| eGFR <sub>crea</sub> * (per 10 ml/min/1.73m <sup>2</sup> )                | 0.876                              | [0.836, 0.919] | <0.001  | 0.880                              | [0.839, 0.922] | <0.001  | 0.902                              | [0.864, 0.941] | <0.001  | 0.926                              | [0.890, 0.965] | <0.001  |
| [eGFR <sub>crea</sub> * (per 10 ml/min/1.73m <sup>2</sup> )] <sup>2</sup> | 1.017                              | [1.003, 1.031] | 0.017   | 1.021                              | [1.008, 1.034] | 0.001   | 1.029                              | [1.015, 1.043] | <0.001  | 1.021                              | [0.999, 1.043] | 0.067   |
| [eGFR <sub>crea</sub> * (per 10 ml/min/1.73m <sup>2</sup> )] <sup>3</sup> | 0.998                              | [0.994, 1.002] | 0.356   | 0.995                              | [0.991, 0.999] | 0.022   | 0.997                              | [0.993, 1.002] | 0.269   | 0.994                              | [0.988, 1.000] | 0.051   |
| BMI* (per 5 kg/m <sup>2</sup> )                                           | 0.925                              | [0.886, 0.966] | <0.001  | 0.903                              | [0.863, 0.944] | <0.001  | 0.872                              | [0.831, 0.915] | <0.001  | 0.866                              | [0.827, 0.906] | <0.001  |

eGFR, estimated glomerular filtration rate; BMI, body mass index

\*centered on its mean; estimates from multivariable models including history of hypertension, diabetes, stroke or transient ischemic attack, peripheral artery disease, heart failure, mean arterial pressure, past smoker, current smoker, alcohol consumption and the interaction eGFR<sub>crea</sub> x diabetes

**Supplementary Table 3.** Multivariable model for the association of eGFR and BMI with sNfL including adjustment for MRI variables

| Variables<br>(N=1,402)                                            | using eGFR <sub>crea</sub> |                  | using eGFR <sub>crea-cys</sub> |                |
|-------------------------------------------------------------------|----------------------------|------------------|--------------------------------|----------------|
|                                                                   | $\beta_{\text{mult}}$      | 95%-CI           | $\beta_{\text{mult}}$          | 95%-CI         |
| Age (centered; per decade)                                        | 1.249                      | [1.181, 1.320]   | 1.203                          | [1.140, 1.269] |
| [Age (centered; per decade)] <sup>3</sup>                         | 0.984                      | [0.969, 1.000]   | 0.984                          | [0.969, 0.999] |
| eGFR (centered; per 10 ml/min/1.73m <sup>2</sup> )                | 0.889                      | [0.866, 0.912]   | 0.878                          | [0.859, 0.898] |
| [eGFR (centered; per 10 ml/min/1.73m <sup>2</sup> )] <sup>2</sup> | 1.025                      | [1.017, 1.034]   | 1.023                          | [1.016, 1.029] |
| [eGFR (centered; per 10 ml/min/1.73m <sup>2</sup> )] <sup>3</sup> | 0.998                      | [0.995, 1.000]   | 0.997                          | [0.996, 0.999] |
| BMI (centered; per 5 kg/m <sup>2</sup> )                          | 0.902                      | [0.877, 0.928]   | 0.893                          | [0.869, 0.917] |
| History of hypertension                                           | eliminated*                |                  | eliminated*                    |                |
| History of diabetes mellitus                                      | 1.172                      | [1.087, 1.263]   | 1.168                          | [1.087, 1.256] |
| History of stroke or transient ischemic attack                    | 1.078                      | [1.005, 1.156]   | 1.073                          | [1.002, 1.148] |
| History of peripheral artery disease                              | eliminated*                |                  | eliminated*                    |                |
| History of heart failure                                          | 1.064                      | [0.999, 1.133]   | eliminated*                    |                |
| Mean arterial pressure (per 1 mmHg)                               | 0.998                      | [0.996, 1.000]   | eliminated*                    |                |
| Past smoker (ref: non-smoker)                                     | eliminated*                |                  | eliminated*                    |                |
| Current smoker (ref: non-smoker)                                  | eliminated*                |                  | eliminated*                    |                |
| Alcohol consumption (per 1 std.drink/d)                           | eliminated*                |                  | eliminated*                    |                |
| Presence of SNCIs                                                 | eliminated*                |                  | eliminated*                    |                |
| Volume of SNCIs (log-transformed, centered)                       | eliminated*                |                  | eliminated*                    |                |
| Presence of LNCCIs                                                | 1.072                      | [1.003, 1.145]   | 1.064                          | [0.998, 1.134] |
| Volume of LNCCIs (log-transformed, centered)                      | 1.047                      | [1.019, 1.076]   | 1.047                          | [1.020, 1.074] |
| Presence of microbleeds                                           | 1.076                      | [1.011, 1.145]   | 1.068                          | [1.006, 1.135] |
| Count of microbleeds                                              | eliminated*                |                  | eliminated*                    |                |
| Volume of WMLs (log-transformed, centered)                        | 1.042                      | [1.021, 1.065]   | 1.037                          | [1.017, 1.059] |
| Normalized brain volume (per 1 cm <sup>3</sup> )                  | 0.9998                     | [0.9995, 1.0001] | eliminated*                    |                |
| Interaction eGFR x age                                            | 1.021                      | [0.999, 1.044]   | 1.023                          | [1.004, 1.042] |
| Interaction BMI x age                                             | eliminated*                |                  | eliminated*                    |                |
| Interaction eGFR x diabetes                                       | eliminated*                |                  | eliminated*                    |                |

BMI, body mass index; eGFR, estimated glomerular filtration rate; SNCIs, small non-cortical infarcts; LNCCIs; large non-cortical or cortical infarcts; WMLs, white matter lesions

\*stepwise backward elimination based on Akaike's information criterion
